# Supplementary material
Source: PubMed Central journal article supplement (PMC4917925)
Supplement: es6b01021_si_001.pdf [file es6b01021_si_001.pdf]

## **Supporting information**

**Manuscript title.** Teachers and sanitation promotion: an assessment of community-led total sanitation in Ethiopia

**Authors.** Jonny Crocker, Abiyot Geremew, Messele Yetie, Fisseha Atalie, Jamie Bartram

**Number of pages.** 29

**Number of tables.** 12

**Number of figures.** 2

**Table S1. Timeline of main implementation activities for two CLTS interventions in Ethiopia.**

| Period              | HEW facilitated CLTS                 | Teacher facilitated CLTS           |
|---------------------|--------------------------------------|------------------------------------|
| Sep 2012            | District orientation                 | District orientation               |
| Oct 2012            | Pre-triggering                       | Pre-triggering                     |
| Nov 2012            | HEW and kebele leader training       | Teacher and kebele leader training |
| Nov 2012 - Jan 2013 | Triggering                           | Triggering                         |
| Dec 2012 - May 2013 | Follow-up                            | Follow-up                          |
| Mar 2013            | HEW and kebele leader review meeting | Teacher review meeting             |
| Jun - Nov 2013      | ODF certification and celebrations   | ODF certification and celebrations |
| Sep 2013            | Natural leader training              | Natural leader training            |

**Table S2. Census and survey sampling counts for kebele, village, and household (HH) levels, by intervention and region, in Ethiopia.**

| Approach            | Region | Kebele   | Census   |      | Sampled  |     | HHs surveyed |            |
|---------------------|--------|----------|----------|------|----------|-----|--------------|------------|
|                     |        |          | Villages | HHs  | Villages | HHs | Baseline     | Follow-up* |
| Conventional        | Oromia | Kebele 1 | 24       | 651  | 18       | 515 | 479          | 490        |
|                     | SNNP   | Kebele 2 | 30       | 973  | 14       | 530 | 496          | 499        |
| Teacher-facilitated | Oromia | Kebele 3 | 32       | 1000 | 11       | 335 | 285          | 320        |
|                     |        | Kebele 4 | 22       | 586  | 13       | 333 | 280          | 308        |
|                     | SNNP   | Kebele 5 | 31       | 1212 | 9        | 363 | 324          | 322        |
|                     |        | Kebele 6 | 26       | 1040 | 10       | 368 | 318          | 324        |

\*Baseline and follow-up surveys were administered in October 2012 and 2013.

**Table S3. Sanitation practice definitions.**

| Sanitation practice | Primary place of defecation                                                                                                                                                                                   |
|---------------------|---------------------------------------------------------------------------------------------------------------------------------------------------------------------------------------------------------------|
| Open defecation     | Anywhere in the open, including in the bush, field, river, or pond. Includes dig and bury, and households reporting using a latrine that surveyors observed to be full or have a collapsed or unstable floor. |
| Communal latrine    | A public latrine accessible to anyone (including school-latrines).                                                                                                                                            |
| Shared latrine      | A latrine shared by multiple households,* including when one compound** shares a latrine, multiple households jointly own a latrine, or a household uses a neighbor's latrine.                                |
| Private latrine     | A latrine used by only one household, either owned or rented in the case of tenants.                                                                                                                          |

\*A household was defined as a single housing unit with one acknowledged male or female head of household.

\*\*A compound is a group of household sharing a patio or courtyard.

**Table S4. Logistic regression models: sanitation practice as a function of teacher-facilitated CLTS compared to conventional CLTS in Ethiopia, full sample.**

| Variable                                                          | Sanitation practice outcome |                      |                      |                      |                      |                      |                      |                      |
|-------------------------------------------------------------------|-----------------------------|----------------------|----------------------|----------------------|----------------------|----------------------|----------------------|----------------------|
|                                                                   | Open defecation             |                      | Communal latrine use |                      | Shared latrine use   |                      | Private latrine use  |                      |
| Treatment                                                         | 0.418***<br>(0.113)         | 0.256**<br>(0.116)   | -1.131*<br>(0.620)   | -1.238*<br>(0.620)   | -0.372<br>(0.391)    | -0.511<br>(0.402)    | -0.372***<br>(0.113) | -0.199*<br>(0.117)   |
| Time                                                              | -1.067***<br>(0.131)        | -1.11***<br>(0.135)  | 0.661<br>(0.459)     | 0.694*<br>(0.467)    | 1.668***<br>(0.351)  | 1.625***<br>(0.348)  | 0.668***<br>(0.114)  | 0.715***<br>(0.121)  |
| Treat * Time                                                      | 0.523***<br>(0.188)         | 0.527***<br>(0.195)  | 1.466*<br>(0.746)    | 1.503<br>(0.755)     | 0.215<br>(0.435)     | 0.224<br>(0.437)     | -0.416**<br>(0.170)  | -0.432**<br>(0.181)  |
| HH size (people)                                                  |                             | -0.535***<br>(0.113) |                      | -0.212<br>(0.442)    |                      | -0.667**<br>(0.321)  |                      | 0.579***<br>(0.102)  |
| Metal roof (%)                                                    |                             | 0.007<br>(0.015)     |                      | -0.469***<br>(0.080) |                      | -0.181***<br>(0.057) |                      | 0.034**<br>(0.015)   |
| Water collection time (round trip, minutes)                       |                             | -0.003**<br>(0.001)  |                      | 0.006**<br>(0.003)   |                      | -0.002<br>(0.003)    |                      | 0.003**<br>(0.001)   |
| Spoke with neighbor about san. or hyg. in past 2 months (%)       |                             | -0.621***<br>(0.116) |                      | 0.290<br>(0.306)     |                      | -0.063<br>(0.237)    |                      | 0.575***<br>(0.103)  |
| Constant                                                          | -0.503***<br>(0.086)        | 0.063<br>(0.144)     | -4.629***<br>(0.312) | -2.690***<br>(0.370) | -4.366***<br>(0.283) | -3.107***<br>(0.453) | 0.410***<br>(0.089)  | -0.384***<br>(0.140) |
| <b>Transformed difference-in-difference, in percentage points</b> | 7.4%*<br>(0.040)            | 8.2%**<br>(0.041)    | 0.014<br>(0.010)     | 0.8%<br>(0.006)      | -0.005<br>(0.013)    | -0.9%<br>(0.012)     | -8.3%**<br>(0.040)   | -9.0%**<br>(0.043)   |

The full sample is 6 kebeles. The survey sample is 76 / 165 villages. Analysis includes data collected at two times, immediately before and after the CLTS interventions: baseline (Oct 2012, 2182 households surveyed), and follow-up (Oct 2013, 2153 households surveyed). Sanitation practice outcomes were modeled using logistic regressions as a function of just treatment group and time, then with with addition of four covariates (roofing material, household size, water collection time, and discussing sanitation or hygiene with a neighbor in the past two months). Unequal selection probability, non-response rates, and village clustering of outcomes were accounted for using the “svyset” command in STATA 12/13/SE. Difference-in-difference estimates are calculated with all covariates set to their mean. \* p < 0.1 \*\* p < 0.05 \*\*\* p < 0.01

**Table S5. Logistic regression models: open defecation and private latrine use as functions of teacher-facilitated CLTS compared to conventional CLTS in Ethiopia, by region.**

| Variable                                                          | Outcome: open defecation    |                             |                          |                          | Outcome: private latrine use |                              |                         |                         |
|-------------------------------------------------------------------|-----------------------------|-----------------------------|--------------------------|--------------------------|------------------------------|------------------------------|-------------------------|-------------------------|
|                                                                   | Oromia region               |                             | SNNP region              |                          | Oromia region                |                              | SNNP region             |                         |
| Treatment                                                         | 0.519**<br>(0.220)          | 0.512**<br>(0.231)          | 0.454***<br>(0.152)      | 0.418**<br>(0.158)       | -0.467**<br>(0.218)          | -0.435*<br>(0.232)           | -0.392**<br>(0.158)     | -0.307*<br>(0.166)      |
| Time                                                              | -2.341***<br>(0.284)        | -2.389***<br>(0.296)        | -0.106<br>(0.145)        | -0.122<br>(0.141)        | 1.907***<br>(0.238)          | 2.001***<br>(0.258)          | -0.244*<br>(0.135)      | -0.240*<br>(0.133)      |
| Treat * Time                                                      | 1.231***<br>(0.350)         | 1.263***<br>(0.362)         | -0.100<br>(0.245)        | -0.086<br>(0.246)        | -0.970***<br>(0.308)         | -1.018***<br>(0.330)         | 0.051<br>(0.225)        | 0.039<br>(0.229)        |
| HH size (people)                                                  |                             | -0.470*<br>(0.245)          |                          | -0.144<br>(0.129)        |                              | 0.572**<br>(0.234)           |                         | 0.225*<br>(0.113)       |
| Metal roof (%)                                                    |                             | -0.012<br>(0.022)           |                          | -0.069**<br>(0.026)      |                              | 0.027<br>(0.022)             |                         | 0.130***<br>(0.025)     |
| Water collection time (round trip, minutes)                       |                             | 0.002<br>(0.002)            |                          | 0.000<br>(0.002)         |                              | -0.002<br>(0.002)            |                         | 0.000<br>(0.002)        |
| Spoke with neighbor about san. or hyg. in past 2 months (%)       |                             | -0.268<br>(0.173)           |                          | 0.099<br>(0.150)         |                              | 0.173<br>(0.189)             |                         | -0.004<br>(0.124)       |
| Constant                                                          | 0.491***<br>(0.165)         | 0.569**<br>(0.254)          | -1.302***<br>(0.104)     | -0.935***<br>(0.151)     | -0.586***<br>(0.167)         | -0.804***<br>(0.259)         | 1.174***<br>(0.117)     | 0.369**<br>(0.150)      |
| <b>Transformed difference-in-difference, in percentage points</b> | <b>22.6%***<br/>(0.072)</b> | <b>22.9%***<br/>(0.072)</b> | <b>-2.4%<br/>(0.046)</b> | <b>-2.1%<br/>(0.046)</b> | <b>-21.9%***<br/>(0.068)</b> | <b>-22.5%***<br/>(0.071)</b> | <b>0.4%<br/>(0.048)</b> | <b>0.3%<br/>(0.048)</b> |

The Oromia region sample is 3 kebeles, from which 1044 households were surveyed in October 2012 at baseline, and 1018 households were surveyed in October 2013 at follow-up, representing 43 / 78 villages in the kebeles. The SNNP region sample is 3 kebeles, from which 1138 households were surveyed in October 2012 at baseline, and 1135 households were surveyed in October 2013 at follow-up, representing 33 / 87 villages in the kebeles. Sanitation practice outcomes were modeled using logistic regressions as a function of just treatment group and time, then with with addition of four covariates (roofing material, household size, water collection time, and discussing sanitation or hygiene with a neighbor in the past two months). Unequal selection probability, non-response rates, and village clustering of outcomes were accounted for using the “svyset” command in STATA 12/13/SE. Difference-in-difference estimates are calculated with all covariates set to their mean. \* p < 0.1 \*\* p < 0.05 \*\*\* p < 0.01

**Table S6. Logistic regression parameters: open defecation as a function of teacher-facilitated CLTS compared to conventional CLTS in Ethiopia, full sample.**

| <b>Variable</b>                                             | <b>Coefficient</b> | <b>SE</b> | <b>t-stat</b> | <b>p-value</b> | <b>[95% CI]</b> |       |
|-------------------------------------------------------------|--------------------|-----------|---------------|----------------|-----------------|-------|
| Treatment (Teacher-fac. CLTS)                               | 0.26               | 0.12      | 2.20          | 0.031          | 0.02            | 0.49  |
| Time                                                        | -1.11              | 0.14      | -8.22         | 0.000          | -1.38           | -0.84 |
| Treatment * time                                            | 0.53               | 0.20      | 2.70          | 0.009          | 0.14            | 0.92  |
| Metal roof (%)                                              | -0.53              | 0.11      | -4.74         | 0.000          | -0.76           | -0.31 |
| HH size (people)                                            | 0.01               | 0.02      | 0.50          | 0.620          | -0.02           | 0.04  |
| Water collection time (round trip, minutes)                 | 0.00               | 0.00      | -2.39         | 0.019          | -0.01           | 0.00  |
| Spoke with neighbor about san. or hyg. in past 2 months (%) | -0.62              | 0.12      | -5.33         | 0.000          | -0.85           | -0.39 |
| Constant                                                    | 0.06               | 0.14      | 0.44          | 0.662          | -0.22           | 0.35  |

  

| <b>Transformed regression parameters</b> | <b>Percentage of households</b> |                  | <b>Difference</b> | <b>p-value</b> | <b>[95% CI]</b> |        |
|------------------------------------------|---------------------------------|------------------|-------------------|----------------|-----------------|--------|
|                                          | <b>Baseline</b>                 | <b>Follow-up</b> |                   |                |                 |        |
| <b>Treatment group</b>                   |                                 |                  |                   |                |                 |        |
| Conventional CLTS                        | 40.0%                           | 18.0%            | <b>-22.0%</b>     | <b>0.000</b>   | -27.2%          | -16.8% |
| Teacher-facilitated CLTS                 | 46.2%                           | 32.4%            | <b>-13.8%</b>     | <b>0.000</b>   | -20.0%          | -7.6%  |
| Difference-in-difference                 | -                               | -                | <b>8.2%</b>       | <b>0.048</b>   | 0.1%            | 16.3%  |

The full sample is 6 kebeles. The survey sample is 76 / 165 villages. Analysis includes data collected at two times, immediately before and after the CLTS interventions: baseline (Oct 2012, 2182 households surveyed), and follow-up (Oct 2013, 2153 households surveyed). Open defecation was modeled using a logistic regression as a function of treatment group, time, and four covariates (roofing material, household size, water collection time, and discussing sanitation or hygiene with a neighbor in the past two months). Unequal selection probability, non-response rates, and village clustering of outcomes were accounted for using the “svyset” command in STATA 12/13/SE. Difference-in-difference estimates are calculated with all covariates set to their mean.

**Table S7. Logistic regression parameters: open defecation as a function of teacher-facilitated CLTS compared to conventional CLTS in Ethiopia, Oromia region.**

| <b>Variable</b>                                             | <b>Coefficient</b> | <b>SE</b> | <b>t-stat</b> | <b>p-value</b> | <b>[95% CI]</b> |       |
|-------------------------------------------------------------|--------------------|-----------|---------------|----------------|-----------------|-------|
| Treatment                                                   | 0.51               | 0.23      | 2.22          | 0.032          | 0.05            | 0.98  |
| Time                                                        | -2.39              | 0.30      | -8.06         | 0.000          | -2.99           | -1.79 |
| Treatment * time                                            | 1.26               | 0.36      | 3.49          | 0.001          | 0.53            | 1.99  |
| Metal roof (%)                                              | -0.47              | 0.24      | -1.92         | 0.062          | -0.97           | 0.03  |
| HH size (people)                                            | -0.01              | 0.02      | -0.57         | 0.575          | -0.06           | 0.03  |
| Water collection time (round trip, minutes)                 | 0.00               | 0.00      | 1.24          | 0.223          | 0.00            | 0.01  |
| Spoke with neighbor about san. or hyg. in past 2 months (%) | -0.27              | 0.17      | -1.55         | 0.130          | -0.62           | 0.08  |
| Constant                                                    | 0.57               | 0.25      | 2.25          | 0.030          | 0.06            | 1.08  |

  

| <b>Transformed regression parameters</b> | <b>Percentage of households</b> |                  | <b>Difference</b> | <b>p-value</b> | <b>[95% CI]</b> |        |
|------------------------------------------|---------------------------------|------------------|-------------------|----------------|-----------------|--------|
| <b>Treatment group</b>                   | <b>Baseline</b>                 | <b>Follow-up</b> |                   |                |                 |        |
| Conventional CLTS                        | 62.3%                           | 13.2%            | <b>-49.1%</b>     | <b>0.000</b>   | -59.4%          | -38.9% |
| Teacher-facilitated CLTS                 | 73.4%                           | 47.2%            | <b>-26.2%</b>     | <b>0.000</b>   | -36.2%          | -16.2% |
| Difference-in-difference                 | -                               | -                | <b>22.9%</b>      | <b>0.002</b>   | 8.8%            | 37.1%  |

The Oromia region sample is 3 kebeles. The survey sample is 43 / 78 villages. Analysis includes data collected at two times, immediately before and after the CLTS interventions: baseline (Oct 2012, 1044 households surveyed), and follow-up (Oct 2013, 1018 households surveyed). Open defecation was modeled using a logistic regression as a function of treatment group, time, and four covariates (roofing material, household size, water collection time, and discussing sanitation or hygiene with a neighbor in the past two months). Unequal selection probability, non-response rates, and village clustering of outcomes were accounted for using the “svyset” command in STATA 12/13/SE. Difference-in-difference estimates are calculated with all covariates set to their mean.

**Table S8. Logistic regression parameters: open defecation as a function of teacher-facilitated CLTS compared to conventional CLTS in Ethiopia, SNNP region.**

| <b>Variable</b>                                             | <b>Coefficient</b> | <b>SE</b> | <b>t-stat</b> | <b>p-value</b> | <b>[95% CI]</b> |       |
|-------------------------------------------------------------|--------------------|-----------|---------------|----------------|-----------------|-------|
| Treatment                                                   | 0.42               | 0.16      | 2.64          | 0.013          | 0.10            | 0.74  |
| Time                                                        | -0.12              | 0.14      | -0.86         | 0.394          | -0.41           | 0.17  |
| Treatment * time                                            | -0.09              | 0.25      | -0.35         | 0.728          | -0.59           | 0.42  |
| Metal roof (%)                                              | -0.14              | 0.13      | -1.11         | 0.274          | -0.41           | 0.12  |
| HH size (people)                                            | -0.07              | 0.03      | -2.61         | 0.014          | -0.12           | -0.02 |
| Water collection time (round trip, minutes)                 | 0.00               | 0.00      | 0.17          | 0.868          | 0.00            | 0.00  |
| Spoke with neighbor about san. or hyg. in past 2 months (%) | 0.10               | 0.15      | 0.66          | 0.515          | -0.21           | 0.41  |
| Constant                                                    | -0.93              | 0.15      | -6.18         | 0.000          | -1.24           | -0.63 |

  

| <b>Transformed regression parameters</b> | <b>Percentage of households</b> |                  | <b>Difference</b> | <b>p-value</b> | <b>[95% CI]</b> |      |
|------------------------------------------|---------------------------------|------------------|-------------------|----------------|-----------------|------|
| <b>Open defecation</b>                   | <b>Baseline</b>                 | <b>Follow-up</b> |                   |                |                 |      |
| Conventional CLTS                        | 21.7%                           | 19.7%            | -2.0%             | 0.384          | -6.5%           | 2.5% |
| Teacher-facilitated CLTS                 | 29.6%                           | 25.4%            | -4.1%             | 0.296          | -11.9%          | 3.6% |
| Difference-in-difference                 | -                               | -                | -2.1%             | 0.639          | -11.1%          | 6.8% |

The SNNP region sample is 3 kebeles. The survey sample is 33 / 87 villages. Analysis includes data collected at two times, immediately before and after the CLTS interventions: baseline (Oct 2012, 1138 households surveyed), and follow-up (Oct 2013, 1135 households surveyed). Open defecation was modeled using a logistic regression as a function of treatment group, time, and four covariates (roofing material, household size, water collection time, and discussing sanitation or hygiene with a neighbor in the past two months). Unequal selection probability, non-response rates, and village clustering of outcomes were accounted for using the “svyset” command in STATA 12/13/SE. Difference-in-difference estimates are calculated with all covariates set to their mean.

**Table S9. Logistic regression parameters: communal latrine use as a function of teacher-facilitated CLTS compared to conventional CLTS in Ethiopia, full sample.**

| Variable                                                    | Coefficient | SE   | t-stat | p-value | [95% CI] |       |
|-------------------------------------------------------------|-------------|------|--------|---------|----------|-------|
| Treatment                                                   | -1.24       | 0.62 | -2.00  | 0.050   | -2.47    | 0.00  |
| Time                                                        | 0.69        | 0.47 | 1.49   | 0.142   | -0.24    | 1.63  |
| Treatment * time                                            | 1.50        | 0.75 | 1.99   | 0.050   | 0.00     | 3.01  |
| Metal roof (%)                                              | -0.21       | 0.44 | -0.48  | 0.632   | -1.09    | 0.67  |
| HH size (people)                                            | -0.47       | 0.08 | -5.89  | 0.000   | -0.63    | -0.31 |
| Water collection time (round trip, minutes)                 | 0.01        | 0.00 | 2.35   | 0.022   | 0.00     | 0.01  |
| Spoke with neighbor about san. or hyg. in past 2 months (%) | 0.29        | 0.31 | 0.95   | 0.348   | -0.32    | 0.90  |
| Constant                                                    | -2.69       | 0.37 | -7.27  | 0.000   | -3.43    | -1.95 |

  

| Transformed regression parameters<br>Treatment group | Percentage of households |           | Difference  | p-value      | [95% CI] |      |
|------------------------------------------------------|--------------------------|-----------|-------------|--------------|----------|------|
|                                                      | Baseline                 | Follow-up |             |              |          |      |
| Conventional CLTS                                    | 0.6%                     | 1.3%      | 0.6%        | 0.159        | -0.2%    | 1.5% |
| Teacher-facilitated CLTS                             | 0.2%                     | 1.6%      | <b>1.5%</b> | <b>0.001</b> | 0.6%     | 2.3% |
| Difference-in-difference                             | -                        | -         | 0.8%        | 0.203        | -0.4%    | 2.1% |

The full sample is 6 kebeles. The survey sample is 76 / 165 villages. Analysis includes data collected at two times, immediately before and after the CLTS interventions: baseline (Oct 2012, 2182 households surveyed), and follow-up (Oct 2013, 2153 households surveyed). Communal latrine use was modeled using a logistic regression as a function of treatment group, time, and four covariates (roofing material, household size, water collection time, and discussing sanitation or hygiene with a neighbor in the past two months). Unequal selection probability, non-response rates, and village clustering of outcomes were accounted for using the “svyset” command in STATA 12/13/SE. Difference-in-difference estimates are calculated with all covariates set to their mean.



**Table S10. Logistic regression parameters: shared latrine use as a function of teacher-facilitated CLTS compared to conventional CLTS in Ethiopia, full sample.**

| <b>Variable</b>                                             | <b>Coefficient</b>              | <b>SE</b>        | <b>t-stat</b>     | <b>p-value</b> | <b>[95% CI]</b> |       |
|-------------------------------------------------------------|---------------------------------|------------------|-------------------|----------------|-----------------|-------|
| Treatment                                                   | -0.51                           | 0.40             | -1.27             | 0.207          | -1.31           | 0.29  |
| Time                                                        | 1.62                            | 0.35             | 4.67              | 0.000          | 0.93            | 2.32  |
| Treatment * time                                            | 0.22                            | 0.44             | 0.51              | 0.610          | -0.65           | 1.09  |
| Metal roof (%)                                              | -0.67                           | 0.32             | -2.08             | 0.041          | -1.31           | -0.03 |
| HH size (people)                                            | -0.18                           | 0.06             | -3.18             | 0.002          | -0.29           | -0.07 |
| Water collection time (round trip, minutes)                 | 0.00                            | 0.00             | -0.68             | 0.501          | -0.01           | 0.00  |
| Spoke with neighbor about san. or hyg. in past 2 months (%) | -0.06                           | 0.24             | -0.26             | 0.792          | -0.54           | 0.41  |
| Constant                                                    | -3.11                           | 0.45             | -6.87             | 0.000          | -4.01           | -2.20 |
| <b>Transformed regression parameters</b>                    | <b>Percentage of households</b> |                  | <b>Difference</b> | <b>p-value</b> | <b>[95% CI]</b> |       |
| <b>Treatment group</b>                                      | <b>Baseline</b>                 | <b>Follow-up</b> |                   |                |                 |       |
| Conventional CLTS                                           | 1.2%                            | 5.9%             | <b>4.7%</b>       | <b>0.000</b>   | 2.6%            | 6.8%  |
| Teacher-facilitated CLTS                                    | 0.7%                            | 4.5%             | <b>3.7%</b>       | <b>0.000</b>   | 2.4%            | 5.1%  |
| Difference-in-difference                                    | -                               | -                | -0.9%             | 0.437          | -3.2%           | 1.4%  |

The full sample is 6 kebeles. The survey sample is 76 / 165 villages. Analysis includes data collected at two times, immediately before and after the CLTS interventions: baseline (Oct 2012, 2182 households surveyed), and follow-up (Oct 2013, 2153 households surveyed). Shared latrine use was modeled using a logistic regression as a function of treatment group, time, and four covariates (roofing material, household size, water collection time, and discussing sanitation or hygiene with a neighbor in the past two months). Unequal selection probability, non-response rates, and village clustering of outcomes were accounted for using the “svyset” command in STATA 12/13/SE. Difference-in-difference estimates are calculated with all covariates set to their mean.

**Table S11. Logistic regression parameters: private latrine use as a function of teacher-facilitated CLTS compared to conventional CLTS in Ethiopia, full sample.**

| <b>Variable</b>                                             | <b>Coefficient</b> | <b>SE</b> | <b>t-stat</b> | <b>p-value</b> | <b>[95% CI]</b> |       |
|-------------------------------------------------------------|--------------------|-----------|---------------|----------------|-----------------|-------|
| Treatment                                                   | -0.20              | 0.12      | -1.70         | 0.093          | -0.43           | 0.03  |
| Time                                                        | 0.72               | 0.12      | 5.93          | 0.000          | 0.47            | 0.96  |
| Treatment * time                                            | -0.43              | 0.18      | -2.38         | 0.020          | -0.79           | -0.07 |
| Metal roof (%)                                              | 0.58               | 0.10      | 5.69          | 0.000          | 0.38            | 0.78  |
| HH size (people)                                            | 0.03               | 0.01      | 2.28          | 0.025          | 0.00            | 0.06  |
| Water collection time (round trip, minutes)                 | 0.00               | 0.00      | 2.26          | 0.027          | 0.00            | 0.01  |
| Spoke with neighbor about san. or hyg. in past 2 months (%) | 0.58               | 0.10      | 5.56          | 0.000          | 0.37            | 0.78  |
| Constant                                                    | -0.38              | 0.14      | -2.73         | 0.008          | -0.66           | -0.10 |

  

| <b>Transformed regression parameters</b> | <b>Percentage of households</b> |                  | <b>Difference</b> | <b>p-value</b> | <b>[95% CI]</b> |       |
|------------------------------------------|---------------------------------|------------------|-------------------|----------------|-----------------|-------|
| <b>Treatment group</b>                   | <b>Baseline</b>                 | <b>Follow-up</b> |                   |                |                 |       |
| Conventional CLTS                        | 57.5%                           | 73.5%            | <b>15.9%</b>      | <b>0.000</b>   | 10.6%           | 21.3% |
| Teacher-facilitated CLTS                 | 52.6%                           | 59.6%            | <b>7.0%</b>       | <b>0.032</b>   | 0.6%            | 13.4% |
| Difference-in-difference                 | -                               | -                | <b>-9.0%</b>      | <b>0.035</b>   | -17.3%          | -0.6% |

The full sample is 6 kebeles. The survey sample is 76 / 165 villages. Analysis includes data collected at two times, immediately before and after the CLTS interventions: baseline (Oct 2012, 2182 households surveyed), and follow-up (Oct 2013, 2153 households surveyed). Private latrine use was modeled using a logistic regression as a function of treatment group, time, and four covariates (roofing material, household size, water collection time, and discussing sanitation or hygiene with a neighbor in the past two months). Unequal selection probability, non-response rates, and village clustering of outcomes were accounted for using the “svyset” command in STATA 12/13/SE. Difference-in-difference estimates are calculated with all covariates set to their mean.

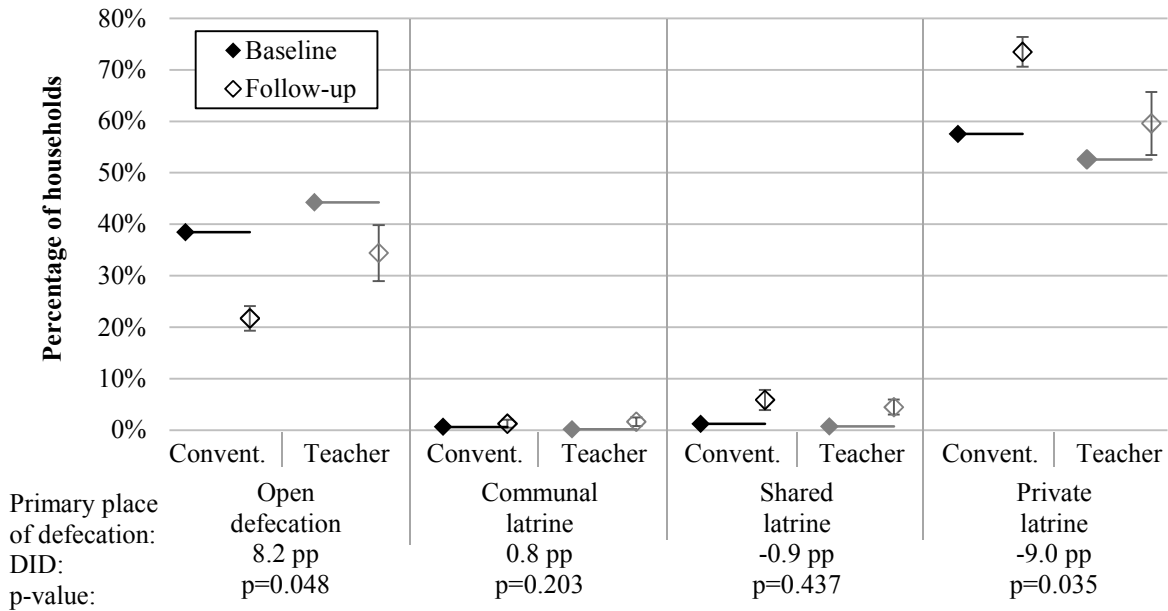

**Figure S1. Sanitation practice before and after conventional and teacher-facilitated CLTS interventions in Ethiopia.** Conventional includes 2 kebeles (54 villages). Teacher-facilitated includes 4 kebeles (111 villages). Kebeles are split evenly between the Oromia and SNNP regions. Horizontal lines are baseline means. Bars are 95% confidence intervals. Sanitation practices are modeled from logistic regression parameters with covariates set to their means (full regressions in the supplement). Sanitation practices are based on survey responses and latrine observations. All analysis accounts for unequal selection probabilities, non-response rates, and village clustering. “DID” = difference-in-difference.

**Table S12. Sanitation practices by households with and without metal roofing**

| <b>Group</b>                      | <b>Percentage of households</b> |                  | <b>Change</b> | <b>p-value</b> |
|-----------------------------------|---------------------------------|------------------|---------------|----------------|
|                                   | <b>Baseline</b>                 | <b>Follow-up</b> |               |                |
| <b>Practicing open defecation</b> |                                 |                  |               |                |
| Full sample                       | 44.8%                           | 29.6%            | -15.2%        | <0.001         |
| Households with natural roof      | 48.0%                           | 32.6%            | -15.4%        | <0.001         |
| Households with metal roof        | 33.2%                           | 18.8%            | -14.4%        | <0.001         |
| <b>Using a communal latrine</b>   |                                 |                  |               |                |
| Full sample                       | 0.5%                            | 2.4%             | 1.9%          | <0.001         |
| Households with natural roof      | 0.5%                            | 2.7%             | 2.2%          | 0.001          |
| Households with metal roof        | 0.6%                            | 1.3%             | 0.7%          | 0.235          |
| <b>Using a shared latrine</b>     |                                 |                  |               |                |
| Full sample                       | 1.0%                            | 5.4%             | 4.4%          | <0.001         |
| Households with natural roof      | 1.2%                            | 6.0%             | 4.8%          | <0.001         |
| Households with metal roof        | 0.1%                            | 3.1%             | 3.0%          | 0.004          |
| <b>Using a private latrine</b>    |                                 |                  |               |                |
| Full sample                       | 53.7%                           | 62.6%            | 8.9%          | <0.001         |
| Households with natural roof      | 50.3%                           | 58.7%            | 8.4%          | 0.001          |
| Households with metal roof        | 66.1%                           | 76.7%            | 10.6%         | 0.009          |

In this analysis, the full sample contained 2152 households, of which 1706 had a natural roof at baseline, and 476 had a metal roof at baseline. P-values were calculated using a t-test. Unequal selection probability, non-response rates, and village clustering of outcomes were accounted for using the “svyset” command in STATA 12/13/SE.

**Figure S2. Follow-up household survey**

| Section 1: Identification                                                                                                                                      |                                                                |                                                                                                                                                                                                                                                           |  |
|----------------------------------------------------------------------------------------------------------------------------------------------------------------|----------------------------------------------------------------|-----------------------------------------------------------------------------------------------------------------------------------------------------------------------------------------------------------------------------------------------------------|--|
| 1                                                                                                                                                              | District Name                                                  | «District»                                                                                                                                                                                                                                                |  |
| 2                                                                                                                                                              | Kebele Name                                                    | «Community»                                                                                                                                                                                                                                               |  |
| 3                                                                                                                                                              | Village Name                                                   | «Village»                                                                                                                                                                                                                                                 |  |
| 4                                                                                                                                                              | Household ID                                                   | «UniqueID»                                                                                                                                                                                                                                                |  |
| 5                                                                                                                                                              | Date                                                           | 2013 / <u>  </u> / <u>  </u> / <u>  </u> / <u>  </u><br>M M D D                                                                                                                                                                                           |  |
| 6                                                                                                                                                              | Surveyor Name                                                  |                                                                                                                                                                                                                                                           |  |
| Section 2: Demographics                                                                                                                                        |                                                                |                                                                                                                                                                                                                                                           |  |
| 7                                                                                                                                                              | <b>Observe:</b> What is the respondent's sex?                  | 1. <input type="radio"/> Male<br>2. <input type="radio"/> Female                                                                                                                                                                                          |  |
| 8                                                                                                                                                              | <b>What is your age?</b>                                       | <u>  </u>   <u>  </u>   years                                                                                                                                                                                                                             |  |
| 9                                                                                                                                                              | <b>Are you married?</b>                                        | 1. <input type="radio"/> Yes<br>2. <input type="radio"/> No                                                                                                                                                                                               |  |
| 10                                                                                                                                                             | <b>What is the highest grade in school that you completed?</b> | <u>  </u>   <u>  </u>   grade                                                                                                                                                                                                                             |  |
| 11                                                                                                                                                             | <b>Observe:</b> Does the house have a metal roof?              | 1. <input type="radio"/> Yes<br>2. <input type="radio"/> No                                                                                                                                                                                               |  |
| 12                                                                                                                                                             | <b>Observe:</b> How clean is the household compound?           | 1. <input type="radio"/> Abundant trash and solid waste strewn around the yard<br>2. <input type="radio"/> Less than 10 pieces of trash or solid waste evident in the yard<br>3. <input type="radio"/> No trash or waste; the yard is clean of any debris |  |
| 13                                                                                                                                                             | <b>How many years has your family lived in this household?</b> | <u>  </u>   <u>  </u>   years                                                                                                                                                                                                                             |  |
| 14                                                                                                                                                             | <b>How many years have you lived in this community?</b>        | <u>  </u>   <u>  </u>   years                                                                                                                                                                                                                             |  |
| <ul style="list-style-type: none"> <li>• Before moving to the next survey question, check to make sure the response to question 13 is lower than or</li> </ul> |                                                                |                                                                                                                                                                                                                                                           |  |

|                                                                                                                                                                                                                                                                                    |                                                                                                                                                                                                                                                                                                       |                                                                                                                                                                                                                                                                                                                                                                                                                                                          |
|------------------------------------------------------------------------------------------------------------------------------------------------------------------------------------------------------------------------------------------------------------------------------------|-------------------------------------------------------------------------------------------------------------------------------------------------------------------------------------------------------------------------------------------------------------------------------------------------------|----------------------------------------------------------------------------------------------------------------------------------------------------------------------------------------------------------------------------------------------------------------------------------------------------------------------------------------------------------------------------------------------------------------------------------------------------------|
| <p><i>equal to the response to question 14.</i></p> <ul style="list-style-type: none"> <li><i>If response 13 is higher than response 14, ask both questions again starting with question 14.</i></li> </ul>                                                                        |                                                                                                                                                                                                                                                                                                       |                                                                                                                                                                                                                                                                                                                                                                                                                                                          |
| 15a                                                                                                                                                                                                                                                                                | <p><b>What do you think is the <i>highest</i> priority for your community?</b></p> <ul style="list-style-type: none"> <li><i>Do not read the answers.</i></li> <li><i>Check only one response.</i></li> <li><i>If multiple answers are given, ask them to pick the most important one.</i></li> </ul> | <ol style="list-style-type: none"> <li><input type="radio"/> Schools</li> <li><input type="radio"/> Health facilities</li> <li><input type="radio"/> Roads</li> <li><input type="radio"/> Electricity</li> <li><input type="radio"/> Water supply</li> <li><input type="radio"/> Sanitation facilities</li> <li><input type="radio"/> Hygiene or handwashing</li> <li><input type="radio"/> Housing</li> <li><input type="radio"/> Employment</li> </ol> |
| 15b                                                                                                                                                                                                                                                                                |                                                                                                                                                                                                                                                                                                       | <ol style="list-style-type: none"> <li><input type="radio"/> Other (specify):</li> </ol>                                                                                                                                                                                                                                                                                                                                                                 |
| 16                                                                                                                                                                                                                                                                                 | <b>Do you have a television in your house?</b>                                                                                                                                                                                                                                                        | <ol style="list-style-type: none"> <li><input type="radio"/> Yes → go to question 17</li> <li><input type="radio"/> No → go to question 18</li> </ol>                                                                                                                                                                                                                                                                                                    |
| 17                                                                                                                                                                                                                                                                                 | <b>Can you show me the TV?</b>                                                                                                                                                                                                                                                                        | <ol style="list-style-type: none"> <li><input type="radio"/> Shown</li> <li><input type="radio"/> Not show, or not able to show it</li> </ol>                                                                                                                                                                                                                                                                                                            |
| 18                                                                                                                                                                                                                                                                                 | <b>Do you have a radio in your house?</b>                                                                                                                                                                                                                                                             | <ol style="list-style-type: none"> <li><input type="radio"/> Yes → go to question 19</li> <li><input type="radio"/> No → go to question 20</li> </ol>                                                                                                                                                                                                                                                                                                    |
| 19                                                                                                                                                                                                                                                                                 | <b>Can you show me the radio?</b>                                                                                                                                                                                                                                                                     | <ol style="list-style-type: none"> <li><input type="radio"/> Shown</li> <li><input type="radio"/> Not show, or not able to show it</li> </ol>                                                                                                                                                                                                                                                                                                            |
| 20                                                                                                                                                                                                                                                                                 | <b>How many people normally live in this household?</b>                                                                                                                                                                                                                                               | ___   ___   people                                                                                                                                                                                                                                                                                                                                                                                                                                       |
| 21                                                                                                                                                                                                                                                                                 | <b>How many individuals are 18 years and above?</b>                                                                                                                                                                                                                                                   | ___   ___   people                                                                                                                                                                                                                                                                                                                                                                                                                                       |
| 22                                                                                                                                                                                                                                                                                 | <b>How many individuals are between 5 years and 18 years?</b>                                                                                                                                                                                                                                         | ___   ___   people                                                                                                                                                                                                                                                                                                                                                                                                                                       |
| 23                                                                                                                                                                                                                                                                                 | <b>How many individuals are 5 years and below?</b>                                                                                                                                                                                                                                                    | ___   ___   people                                                                                                                                                                                                                                                                                                                                                                                                                                       |
| <ul style="list-style-type: none"> <li><i>Before moving to the next question, check that responses 21 + 22 + 23 = 20, if the responses do not match, ask them again starting with question 20</i></li> <li><i>If the answer to question 23 is 0 → go to question 27</i></li> </ul> |                                                                                                                                                                                                                                                                                                       |                                                                                                                                                                                                                                                                                                                                                                                                                                                          |
| 24                                                                                                                                                                                                                                                                                 | <b>In the last two weeks, how many of your children 5 years of age or younger have had diarrhea?</b>                                                                                                                                                                                                  | ___   ___   children                                                                                                                                                                                                                                                                                                                                                                                                                                     |
| <ul style="list-style-type: none"> <li><i>If the answer to question 24 is 0 → go to question 27</i></li> </ul>                                                                                                                                                                     |                                                                                                                                                                                                                                                                                                       |                                                                                                                                                                                                                                                                                                                                                                                                                                                          |
| 25                                                                                                                                                                                                                                                                                 | <b>Was he/she taken to a health facility for treatment?</b>                                                                                                                                                                                                                                           | <ol style="list-style-type: none"> <li><input type="radio"/> Yes</li> <li><input type="radio"/> No</li> </ol>                                                                                                                                                                                                                                                                                                                                            |

|     |                                                                                                |                                                                            |  |
|-----|------------------------------------------------------------------------------------------------|----------------------------------------------------------------------------|--|
| 26  | <b>Was he/she given any medicine or rehydration solution?</b>                                  | 1. <input type="radio"/> Yes<br>2. <input type="radio"/> No                |  |
| 27  | <b>Do you think people not using latrines are a health risk in your village?</b>               | 1. <input type="radio"/> Yes<br>2. <input type="radio"/> No                |  |
| 28a | <i>Who do you think should bear the cost of improving sanitation in your village?</i>          | <input type="checkbox"/> Family / household                                |  |
| 28b | • Do not read the answers.                                                                     | <input type="checkbox"/> Kebele administration                             |  |
| 28c | • Circle all responses.                                                                        | <input type="checkbox"/> Government (woreda, zone, region, and/or federal) |  |
| 28d | • After they have finished responding, ask <i>“are there any more occasions?”</i>              | <input type="checkbox"/> NGOs / partners                                   |  |
| 28e | • If the respondent indicates that (s)he does not know, do not probe for additional responses. | <input type="checkbox"/> Other (specify):                                  |  |

### Section 3: Water

|     |                                                                                           |                                                                                                                                                                                                                                                                                                                                                                                                                                                                                                                                                                                           |  |
|-----|-------------------------------------------------------------------------------------------|-------------------------------------------------------------------------------------------------------------------------------------------------------------------------------------------------------------------------------------------------------------------------------------------------------------------------------------------------------------------------------------------------------------------------------------------------------------------------------------------------------------------------------------------------------------------------------------------|--|
| 29a | <b>What is the main source of drinking water for members of your household?</b>           | 1. <input type="radio"/> River/stream<br>2. <input type="radio"/> Pond/lake<br>3. <input type="radio"/> Open spring<br>4. <input type="radio"/> Protected spring<br>5. <input type="radio"/> Open well<br>6. <input type="radio"/> Protected well<br>7. <input type="radio"/> Tubewell/borehole<br>8. <input type="radio"/> Rainwater harvesting<br>9. <input type="radio"/> Public tap<br>10. <input type="radio"/> Piped water into dwelling or yard<br>11. <input type="radio"/> Water vendor<br>12. <input type="radio"/> Bottled water<br>13. <input type="radio"/> Other (specify): |  |
| 29b |                                                                                           |                                                                                                                                                                                                                                                                                                                                                                                                                                                                                                                                                                                           |  |
| 30  | <b>In the last two weeks, was water unavailable from this source for a day or longer?</b> | 1. <input type="radio"/> Yes<br>2. <input type="radio"/> No                                                                                                                                                                                                                                                                                                                                                                                                                                                                                                                               |  |
| 31  | <b>Do you share this water source with other households?</b>                              | 1. <input type="radio"/> Yes<br>2. <input type="radio"/> No                                                                                                                                                                                                                                                                                                                                                                                                                                                                                                                               |  |
| 32  | <b>Do you pay to use this water</b>                                                       | 1. <input type="radio"/> Yes<br>2. <input type="radio"/> No                                                                                                                                                                                                                                                                                                                                                                                                                                                                                                                               |  |

|     |                                                                                      |                                                                                                                                                                                                                                                                                                                                                                                                                                                                                                                                                                                                            |  |
|-----|--------------------------------------------------------------------------------------|------------------------------------------------------------------------------------------------------------------------------------------------------------------------------------------------------------------------------------------------------------------------------------------------------------------------------------------------------------------------------------------------------------------------------------------------------------------------------------------------------------------------------------------------------------------------------------------------------------|--|
|     | source?                                                                              |                                                                                                                                                                                                                                                                                                                                                                                                                                                                                                                                                                                                            |  |
| 33  | If this source is not in your dwelling or yard, how long does it take to walk to it? | ___   ___   ___   minutes                                                                                                                                                                                                                                                                                                                                                                                                                                                                                                                                                                                  |  |
| 34  | Do you have to queue or wait to get water at this source?                            | 1. <input type="radio"/> Yes<br>2. <input type="radio"/> No                                                                                                                                                                                                                                                                                                                                                                                                                                                                                                                                                |  |
| 35  | How long do you typically have to wait to get water at this source?                  | ___   ___   ___   minutes                                                                                                                                                                                                                                                                                                                                                                                                                                                                                                                                                                                  |  |
| 36  | Is this water source usable year round?                                              | 1. <input type="radio"/> Yes → go to question 38<br>2. <input type="radio"/> No → go to question 37                                                                                                                                                                                                                                                                                                                                                                                                                                                                                                        |  |
| 37a | Where do you get drinking water when your main source is not available?              | 1. <input type="radio"/> River / stream<br>2. <input type="radio"/> Pond/lake<br>3. <input type="radio"/> Open spring<br>4. <input type="radio"/> Protected spring<br>5. <input type="radio"/> Open well<br>6. <input type="radio"/> Protected well<br>7. <input type="radio"/> Tubewell/borehole<br>8. <input type="radio"/> Rainwater harvesting<br>9. <input type="radio"/> Public tap<br>10. <input type="radio"/> Piped water into dwelling or yard<br>11. <input type="radio"/> Water vendor<br>12. <input type="radio"/> Bottled water<br>13. <input type="radio"/> Main source is always available |  |
| 37b |                                                                                      | 14. <input type="radio"/> Other (specify):                                                                                                                                                                                                                                                                                                                                                                                                                                                                                                                                                                 |  |
| 38  | Do you currently treat your drinking water?                                          | 1. <input type="radio"/> Yes → go to question 39<br>2. <input type="radio"/> No → go to question 40                                                                                                                                                                                                                                                                                                                                                                                                                                                                                                        |  |
| 39a | How do you treat your drinking water?                                                | 1. <input type="radio"/> Chlorination<br>2. <input type="radio"/> Filtration with a ceramic device (such as a clay pot, or a candle filter)<br>3. <input type="radio"/> Filtration with a biosand filter<br>4. <input type="radio"/> Solar disinfection<br>5. <input type="radio"/> Boiling<br>6. <input type="radio"/> Chemical coagulant (such as aluminum salt or iron salt)                                                                                                                                                                                                                            |  |



|     |                                                                 |                                                                                                                                                  |  |
|-----|-----------------------------------------------------------------|--------------------------------------------------------------------------------------------------------------------------------------------------|--|
| 39b |                                                                 | 7. <input type="radio"/> Other (specify):                                                                                                        |  |
| 40  | <b>Do you store your drinking water?</b>                        | 1. <input type="radio"/> Yes → go to question 41<br>2. <input type="radio"/> No → go to question 46                                              |  |
| 41  | <b>May I see the container(s) where you store it?</b>           | 1. <input type="radio"/> Allowed<br>2. <input type="radio"/> Not allowed                                                                         |  |
| 42  | <b>Is this container used only for storing drinking water?</b>  | 1. <input type="radio"/> Yes<br>2. <input type="radio"/> No                                                                                      |  |
| 43  | <b>Observe:</b> Does the container have a wide or narrow mouth? | 1. <input type="radio"/> Wide mouth (more than 10 centimeters across)<br>2. <input type="radio"/> Narrow mouth (less than 10 centimeters across) |  |
| 44  | <b>Observe:</b> Does the container have a spigot?               | 1. <input type="radio"/> Yes<br>2. <input type="radio"/> No                                                                                      |  |
| 45  | <b>Observe:</b> Does the container have a lid or fitted cover?  | 1. <input type="radio"/> Yes<br>2. <input type="radio"/> No                                                                                      |  |

#### Section 4: Sanitation

|                                                                          |                                                                                                |                                                                                                                                                                                                                                                                                                                                                                      |  |
|--------------------------------------------------------------------------|------------------------------------------------------------------------------------------------|----------------------------------------------------------------------------------------------------------------------------------------------------------------------------------------------------------------------------------------------------------------------------------------------------------------------------------------------------------------------|--|
| 46a                                                                      | <b>Where do members of your family usually go to defecate?</b><br>• (circle only one response) | 1. <input type="radio"/> Bush, field, river, or pond → go to question 73<br>2. <input type="radio"/> Dig and bury → go to question 73<br>3. <input type="radio"/> Latrine at their own household → go to question 47<br>4. <input type="radio"/> Neighbor's household → go to question 58<br>5. <input type="radio"/> Communal or public latrine → go to question 58 |  |
| 46b                                                                      |                                                                                                | 6. <input type="radio"/> Other (specify): → go to question 58                                                                                                                                                                                                                                                                                                        |  |
| 47                                                                       | <b>May I see the latrine you use please?</b>                                                   | 1. <input type="radio"/> Allowed → go to question 48<br>2. <input type="radio"/> Not allowed → go to question 49                                                                                                                                                                                                                                                     |  |
| • If allowed to see the latrine, walk to the latrine with the respondent |                                                                                                |                                                                                                                                                                                                                                                                                                                                                                      |  |
| 48                                                                       | <b>Observe:</b> Has the path to the latrine been walked on recently?                           | 1. <input type="radio"/> Yes (grass is trampled, wet footprints are visible, or the path has recently been cleared)                                                                                                                                                                                                                                                  |  |

|     |                                                                                      |                                                                                                     |  |
|-----|--------------------------------------------------------------------------------------|-----------------------------------------------------------------------------------------------------|--|
|     |                                                                                      | 2. <input type="radio"/> No                                                                         |  |
| 49  | <b>How much money did you spend to build this latrine?</b>                           | ___   ___   ___   ___   Birr                                                                        |  |
| 50a | <b>What did you buy to construct your latrine?</b><br>• <i>Circle all responses.</i> | <input type="checkbox"/> Cement                                                                     |  |
| 50b |                                                                                      | <input type="checkbox"/> Pre-made slab/squat plate                                                  |  |
| 50c |                                                                                      | <input type="checkbox"/> Wood                                                                       |  |
| 50d |                                                                                      | <input type="checkbox"/> Sheet metal (for walls or roof, etc)                                       |  |
| 50e |                                                                                      | <input type="checkbox"/> Labor/help for digging or construction                                     |  |
| 50f |                                                                                      | <input type="checkbox"/> Other (specify):                                                           |  |
| 51  | <b>How many total hours did it take your family to build this latrine?</b>           | ___   ___   hours                                                                                   |  |
| 52  | <b>Did anyone besides of your family help you to build this latrine?</b>             | 1. <input type="radio"/> Yes → go to question 53<br>2. <input type="radio"/> No → go to question 55 |  |
| 53a | <b>Who helped you to build this latrine?</b><br>• <i>Circle all responses.</i>       | <input type="checkbox"/> Neighbors, other community members                                         |  |
| 53b |                                                                                      | <input type="checkbox"/> Village leaders                                                            |  |
| 53c |                                                                                      | <input type="checkbox"/> Kebele administration                                                      |  |
| 53d |                                                                                      | <input type="checkbox"/> Woreda officials (from health office or other)                             |  |
| 53e |                                                                                      | <input type="checkbox"/> Church, mosque, or other religious group                                   |  |
| 53f |                                                                                      | <input type="checkbox"/> NGOs/partners                                                              |  |
| 53g |                                                                                      | <input type="checkbox"/> Other (specify):                                                           |  |
| 54  | <b>For how many hours did they help you build your latrine?</b>                      | ___   ___   hours                                                                                   |  |

|    |                                                                                        |                                                                                                                   |  |
|----|----------------------------------------------------------------------------------------|-------------------------------------------------------------------------------------------------------------------|--|
| 55 | <b>Do you plan on changing your latrine before the start of the next rainy season?</b> | 1. <input type="radio"/> Yes → <i>go to question 56</i><br>2. <input type="radio"/> No → <i>go to question 58</i> |  |
|----|----------------------------------------------------------------------------------------|-------------------------------------------------------------------------------------------------------------------|--|

|     |                                                                                                    |                                                                                                                                                                                                                                                                                             |  |
|-----|----------------------------------------------------------------------------------------------------|---------------------------------------------------------------------------------------------------------------------------------------------------------------------------------------------------------------------------------------------------------------------------------------------|--|
| 56a | <b>In what way do you plan to change your latrine?</b><br>• Circle all responses.                  | <input type="checkbox"/> New slab/squat plate                                                                                                                                                                                                                                               |  |
| 56b |                                                                                                    | <input type="checkbox"/> New walls                                                                                                                                                                                                                                                          |  |
| 56c |                                                                                                    | <input type="checkbox"/> New roof                                                                                                                                                                                                                                                           |  |
| 56d |                                                                                                    | <input type="checkbox"/> New door                                                                                                                                                                                                                                                           |  |
| 56e |                                                                                                    | <input type="checkbox"/> New/replacement latrine                                                                                                                                                                                                                                            |  |
| 56f |                                                                                                    | <input type="checkbox"/> New/replacement pit                                                                                                                                                                                                                                                |  |
| 56g |                                                                                                    | <input type="checkbox"/> Other (specify):                                                                                                                                                                                                                                                   |  |
| 57a | <b>Who will pay for the changes to your latrine?</b><br>• Circle all responses.                    | <input type="checkbox"/> Me, my family, or my household members                                                                                                                                                                                                                             |  |
| 57b |                                                                                                    | <input type="checkbox"/> Neighbor or friend                                                                                                                                                                                                                                                 |  |
| 57c |                                                                                                    | <input type="checkbox"/> Community members, or chief                                                                                                                                                                                                                                        |  |
| 57d |                                                                                                    | <input type="checkbox"/> An NGO or outside organization                                                                                                                                                                                                                                     |  |
| 57e |                                                                                                    | <input type="checkbox"/> The government, Health Extension Worker, or other officer of water or health                                                                                                                                                                                       |  |
| 57f |                                                                                                    | <input type="checkbox"/> The latrine will not cost any money                                                                                                                                                                                                                                |  |
| 57g |                                                                                                    | <input type="checkbox"/> Other (specify):                                                                                                                                                                                                                                                   |  |
| 58a | <b>What kind of latrine is the latrine your family usually uses?</b><br>• Circle only one response | 1. <input type="radio"/> Bucket toilet<br>2. <input type="radio"/> Simple Pit latrine<br>3. <input type="radio"/> Ventilated improved pit latrine (VIP)<br>4. <input type="radio"/> Composting toilet<br>5. <input type="radio"/> Pour flush toilet<br>6. <input type="radio"/> Septic tank |  |
| 58b |                                                                                                    | 7. <input type="radio"/> Other (Specify):                                                                                                                                                                                                                                                   |  |
| 59  | <b>Do you share this latrine with other households?</b>                                            | 1. <input type="radio"/> Yes → go to question 60<br>2. <input type="radio"/> No → go to question 63                                                                                                                                                                                         |  |
| 60  | <b>How many households do you share this latrine with?</b>                                         | ___   ___   households                                                                                                                                                                                                                                                                      |  |

|     |                                                                                                 |                                                                                                 |  |
|-----|-------------------------------------------------------------------------------------------------|-------------------------------------------------------------------------------------------------|--|
| 61  | Are these households where only relatives of yours live?                                        | 1. <input type="radio"/> Yes→57<br>2. <input type="radio"/> No→56                               |  |
| 62  | Is this toilet used by people that you do not know?                                             | 1. <input type="radio"/> Yes<br>2. <input type="radio"/> No                                     |  |
| 63  | Can you use this facility at all hours of the day and night?                                    | 1. <input type="radio"/> Yes<br>2. <input type="radio"/> No                                     |  |
| 64  | How much time does it take on average to get to the place you defecate?                         | ___   ___   ___   minutes                                                                       |  |
| 65  | Do you have to queue/wait to use this latrine?                                                  | 1. <input type="radio"/> Yes→go to question 66<br>2. <input type="radio"/> No→go to question 67 |  |
| 66  | On average, how long do you have to queue/wait?                                                 | ___   ___   ___   minutes                                                                       |  |
| 67  | Since the beginning of the rainy season, did your latrine become unusable?                      | 1. <input type="radio"/> Yes→go to question 68<br>2. <input type="radio"/> No→go to question 70 |  |
| 68a | <b>Why was it unusable?</b><br>• Circle all responses.                                          | <input type="checkbox"/> Roof problems                                                          |  |
| 68b |                                                                                                 | <input type="checkbox"/> Slab problems                                                          |  |
| 68c |                                                                                                 | <input type="checkbox"/> Pit overflow                                                           |  |
| 68d |                                                                                                 | <input type="checkbox"/> No water in tank                                                       |  |
| 68e |                                                                                                 | <input type="checkbox"/> Flushing mechanism broke down                                          |  |
| 68f |                                                                                                 | <input type="checkbox"/> Bowl overflow/clogged                                                  |  |
| 68g |                                                                                                 | <input type="checkbox"/> Pipe breakdown                                                         |  |
| 68h |                                                                                                 | <input type="checkbox"/> Other (specify):                                                       |  |
| 69  | During that period, how many weeks was it unusable?                                             | ___   ___   weeks                                                                               |  |
| 70  | Do any members of your family defecate in the bush, field, or nearby river when away from home? | 1. <input type="radio"/> Yes<br>2. <input type="radio"/> No                                     |  |

|     |                                                                                                                                                                                                                                                      |                                                                                                                                                                                                                                                                                                                                                                                                                                                                                                                                                                                                                          |  |
|-----|------------------------------------------------------------------------------------------------------------------------------------------------------------------------------------------------------------------------------------------------------|--------------------------------------------------------------------------------------------------------------------------------------------------------------------------------------------------------------------------------------------------------------------------------------------------------------------------------------------------------------------------------------------------------------------------------------------------------------------------------------------------------------------------------------------------------------------------------------------------------------------------|--|
| 71a | <p><b>The last time a child 5 years or younger in your house passed stool, where did he/she defecate?</b></p> <ul style="list-style-type: none"> <li>If the household does not have any children below 5 years of age → go to question 63</li> </ul> | <ol style="list-style-type: none"> <li><input type="radio"/> Used potty → go to question 73</li> <li><input type="radio"/> Used diaper → go to question 72</li> <li><input type="radio"/> Went in his/her clothes → go to question 72</li> <li><input type="radio"/> Went in house/yard → go to question 72</li> <li><input type="radio"/> Went outside the premises → go to question 73</li> <li><input type="radio"/> Used own sanitation facility → go to question 73</li> <li><input type="radio"/> Used public latrine → go to question 73</li> <li><input type="radio"/> Don't know → go to question 72</li> </ol> |  |
| 71b |                                                                                                                                                                                                                                                      | <ol style="list-style-type: none"> <li><input type="radio"/> Other (specify): → go to question 72</li> </ol>                                                                                                                                                                                                                                                                                                                                                                                                                                                                                                             |  |
| 72a | <p><b>The last time a child in your house passed stool, where were his/her feces disposed?</b></p>                                                                                                                                                   | <ol style="list-style-type: none"> <li><input type="radio"/> Dropped into toilet facility</li> <li><input type="radio"/> Buried</li> <li><input type="radio"/> Solid waste/trash</li> <li><input type="radio"/> In yard</li> <li><input type="radio"/> Outside premises</li> <li><input type="radio"/> Into sink or tub</li> <li><input type="radio"/> Thrown into waterway</li> <li><input type="radio"/> At the well</li> <li><input type="radio"/> Don't know</li> </ol>                                                                                                                                              |  |
| 72b |                                                                                                                                                                                                                                                      | <ol style="list-style-type: none"> <li><input type="radio"/> Thrown elsewhere (specify):</li> </ol>                                                                                                                                                                                                                                                                                                                                                                                                                                                                                                                      |  |

## Section 5: Sanitation, part 2

- If the household has their own latrine at their household, skip to question 80
- If the household does NOT have their own latrine, continue with question 73

|    |                                                                                       |                                                                                                                                                       |  |
|----|---------------------------------------------------------------------------------------|-------------------------------------------------------------------------------------------------------------------------------------------------------|--|
| 73 | <p><b>How much time does it take on average to get to the place you defecate?</b></p> | <p>  ___   ___   ___   minutes</p>                                                                                                                    |  |
| 74 | <p><b>Do you want to have your own household latrine?</b></p>                         | <ol style="list-style-type: none"> <li><input type="radio"/> Yes → go to question 76</li> <li><input type="radio"/> No → go to question 75</li> </ol> |  |

|     |                                                                                 |                                                                                                     |  |
|-----|---------------------------------------------------------------------------------|-----------------------------------------------------------------------------------------------------|--|
| 75a | <b>Why do you not want to have a latrine?</b><br>• Circle all responses.        | <input type="checkbox"/> Expensive → go to question 77                                              |  |
| 75b |                                                                                 | <input type="checkbox"/> Materials not available → go to question 77                                |  |
| 75c |                                                                                 | <input type="checkbox"/> Satisfied with neighbor or shared latrine → go to question 77              |  |
| 75d |                                                                                 | <input type="checkbox"/> Does not see benefit in having a latrine → go to question 77               |  |
| 75e |                                                                                 | <input type="checkbox"/> Culturally unacceptable → go to question 77                                |  |
| 75f |                                                                                 | <input type="checkbox"/> Other (specify): → go to question 77                                       |  |
| 76a | <b>Why do you want to have a latrine?</b><br>• Circle all responses.            | <input type="checkbox"/> Dignity, appearance, or social status                                      |  |
| 76b |                                                                                 | <input type="checkbox"/> Health related reasons                                                     |  |
| 76c |                                                                                 | <input type="checkbox"/> Time or distance spent walking to a latrine                                |  |
| 76d |                                                                                 | <input type="checkbox"/> Safety from others when walking to a shared latrine or the bush            |  |
| 76e |                                                                                 | <input type="checkbox"/> Other (specify):                                                           |  |
| 77a | <b>What is your reason for not having a latrine?</b><br>• Circle all responses. | <input type="checkbox"/> Expensive                                                                  |  |
| 77b |                                                                                 | <input type="checkbox"/> Construction material are not available in the market                      |  |
| 77c |                                                                                 | <input type="checkbox"/> Latrine slabs are not available in the market                              |  |
| 77d |                                                                                 | <input type="checkbox"/> There is no one with technical capacity                                    |  |
| 77e |                                                                                 | <input type="checkbox"/> Does not see any benefits in having their own latrine                      |  |
| 77f |                                                                                 | <input type="checkbox"/> There are higher priorities than a latrine                                 |  |
| 77g |                                                                                 | <input type="checkbox"/> Culturally unacceptable                                                    |  |
| 77h |                                                                                 | <input type="checkbox"/> Other (specify):                                                           |  |
| 78  | <b>Do you plan on building a latrine by the start of the next rainy season?</b> | 1. <input type="radio"/> Yes → go to question 79<br>2. <input type="radio"/> No → go to question 80 |  |
| 79a | <b>Who will pay for the construction of your latrine?</b>                       | <input type="checkbox"/> Me, my family, or my household members                                     |  |

|     |                                                                           |                                                                                                       |  |
|-----|---------------------------------------------------------------------------|-------------------------------------------------------------------------------------------------------|--|
| 79b | <ul style="list-style-type: none"> <li>• Circle all responses.</li> </ul> | <input type="checkbox"/> Neighbor or friend                                                           |  |
| 79c |                                                                           | <input type="checkbox"/> Community members, or chief                                                  |  |
| 79d |                                                                           | <input type="checkbox"/> An NGO or outside organization                                               |  |
| 79e |                                                                           | <input type="checkbox"/> The government, Health Extension Worker, or other officer of water or health |  |
| 79f |                                                                           | <input type="checkbox"/> The latrine will not cost any money                                          |  |
| 79g |                                                                           | <input type="checkbox"/> Other (specify):                                                             |  |

| Section 6: Hygiene |                                                                                                                                  |                                                                                                     |  |
|--------------------|----------------------------------------------------------------------------------------------------------------------------------|-----------------------------------------------------------------------------------------------------|--|
| 80                 | <b>Have you been taught about hygiene and handwashing?</b>                                                                       | 1. <input type="radio"/> Yes → go to question 81<br>2. <input type="radio"/> No → go to question 82 |  |
| 81a                | <b>Who taught you about hygiene or handwashing?</b><br><ul style="list-style-type: none"> <li>• Circle all responses.</li> </ul> | <input type="checkbox"/> School teachers                                                            |  |
| 81b                |                                                                                                                                  | <input type="checkbox"/> Children or students                                                       |  |
| 81c                |                                                                                                                                  | <input type="checkbox"/> Health Extension Workers                                                   |  |
| 81d                |                                                                                                                                  | <input type="checkbox"/> Health Army                                                                |  |
| 81e                |                                                                                                                                  | <input type="checkbox"/> Other (specify):                                                           |  |



|     |                                                                                                                                                                                                                                                                                                                                                                                                                              |                                                                                                                        |  |
|-----|------------------------------------------------------------------------------------------------------------------------------------------------------------------------------------------------------------------------------------------------------------------------------------------------------------------------------------------------------------------------------------------------------------------------------|------------------------------------------------------------------------------------------------------------------------|--|
| 82a | <p><b>Please mention all of the occasions when is it important to wash your hands.</b></p> <ul style="list-style-type: none"> <li>• <i>Do not read the answers.</i></li> <li>• <i>Circle all responses.</i></li> <li>• <i>After they have finished responding, ask “are there any more times?”</i></li> <li>• <i>If the respondent indicates that (s)he does not know, do not probe for additional responses.</i></li> </ul> | <input type="checkbox"/> Before eating                                                                                 |  |
| 82b |                                                                                                                                                                                                                                                                                                                                                                                                                              | <input type="checkbox"/> After eating                                                                                  |  |
| 82c |                                                                                                                                                                                                                                                                                                                                                                                                                              | <input type="checkbox"/> Before praying                                                                                |  |
| 82d |                                                                                                                                                                                                                                                                                                                                                                                                                              | <input type="checkbox"/> Before breastfeeding or feeding a child                                                       |  |
| 82e |                                                                                                                                                                                                                                                                                                                                                                                                                              | <input type="checkbox"/> Before cooking or preparing food                                                              |  |
| 82f |                                                                                                                                                                                                                                                                                                                                                                                                                              | <input type="checkbox"/> After defecation/urination                                                                    |  |
| 82g |                                                                                                                                                                                                                                                                                                                                                                                                                              | <input type="checkbox"/> After cleaning a child that has defecated/changing a child’s nappy                            |  |
| 82h |                                                                                                                                                                                                                                                                                                                                                                                                                              | <input type="checkbox"/> When my hands are dirty                                                                       |  |
| 82i |                                                                                                                                                                                                                                                                                                                                                                                                                              | <input type="checkbox"/> After cleaning the toilet or potty                                                            |  |
| 82j |                                                                                                                                                                                                                                                                                                                                                                                                                              | <input type="checkbox"/> In the morning                                                                                |  |
| 82k |                                                                                                                                                                                                                                                                                                                                                                                                                              | <input type="checkbox"/> Other (specify):                                                                              |  |
| 83  | <p><b>Do you and your family members wash your hands at all of these times?</b></p>                                                                                                                                                                                                                                                                                                                                          | <p>1. <input type="radio"/> Always</p> <p>2. <input type="radio"/> Sometimes</p> <p>3. <input type="radio"/> Never</p> |  |

## Section 7: Latrine Observations

- *If the household has a latrine that you are allowed to observe, continue with question 84*
- *If the household does NOT have a latrine, or has NOT allowed you to see their latrine, skip to question 100*

|    |                                                                                                    |                                                                                                                                                      |  |
|----|----------------------------------------------------------------------------------------------------|------------------------------------------------------------------------------------------------------------------------------------------------------|--|
| 84 | <p><b>Observe:</b> Is there visibly used anal cleansing material in the latrine or in the pit?</p> | <p>1. <input type="radio"/> Yes</p> <p>2. <input type="radio"/> No</p>                                                                               |  |
| 85 | <p><b>Observe:</b> Are there fresh or recent feces evident in the pit?</p>                         | <p>1. <input type="radio"/> Yes</p> <p>2. <input type="radio"/> No</p>                                                                               |  |
| 86 | <p><b>Observe:</b> Are there flies present inside the latrine?</p>                                 | <p>1. <input type="radio"/> Yes – more than 10 flies</p> <p>2. <input type="radio"/> Yes – less than 10 flies</p> <p>3. <input type="radio"/> No</p> |  |

|     |                                                                    |                                                                                                                                                                                                                                                                                                                                                                                                                                                   |  |
|-----|--------------------------------------------------------------------|---------------------------------------------------------------------------------------------------------------------------------------------------------------------------------------------------------------------------------------------------------------------------------------------------------------------------------------------------------------------------------------------------------------------------------------------------|--|
| 87a | <b>Observe:</b> Construction: What are the floor and slab made of? | 1. <input type="radio"/> Sticks or branches and dirt or clay                                                                                                                                                                                                                                                                                                                                                                                      |  |
| 87b |                                                                    | 2. <input type="radio"/> Wooden boards<br>3. <input type="radio"/> Concrete<br>4. <input type="radio"/> Plastic<br>5. <input type="radio"/> Other (specify):                                                                                                                                                                                                                                                                                      |  |
| 88  | <b>Observe:</b> Construction: What are the walls made of?          | 1. <input type="radio"/> Walls are completely deteriorated or collapsed<br>2. <input type="radio"/> Walls are made of a temporary material such as straw or palm leaves<br>3. <input type="radio"/> Walls are made of durable material such as wooden boards, concrete, or adobe                                                                                                                                                                  |  |
| 89  | <b>Observe:</b> Construction: What is the quality of the door?     | 1. <input type="radio"/> Door is absent, or door does not close properly.<br>2. <input type="radio"/> Door is present and can be closed.                                                                                                                                                                                                                                                                                                          |  |
| 90  | <b>Observe:</b> Construction: What is the quality of the roof?     | 1. <input type="radio"/> No roof, or roof in complete disrepair with large gaps that offer no protection<br>2. <input type="radio"/> Roof present but leaky<br>3. <input type="radio"/> Roof present and provides protection from sun and rain                                                                                                                                                                                                    |  |
| 91  | <b>Observe:</b> Maintenance: Is there a hole cover?                | 1. <input type="radio"/> No hole cover present<br>2. <input type="radio"/> Hole cover defective, broken, or not used<br>3. <input type="radio"/> Hole cover placed over hole and tight fitting                                                                                                                                                                                                                                                    |  |
| 92  | <b>Observe:</b> Maintenance: What is the quality of the slab?      | 1. <input type="radio"/> Slab is significantly eroded, deteriorated to the point of being a safety concern.<br>2. <input type="radio"/> Hole significantly eroded or other small gaps or cracks in slab. Not yet a safety hazard.<br>3. <input type="radio"/> Slab more or less intact. No danger of children or adults slipping on uneven eroded surfaces, or of a foot or leg entering the pit through enlarged hole or other gaps in the slab. |  |

|    |                                                                                 |                                                                                                                                                                                                                                                                                                     |  |
|----|---------------------------------------------------------------------------------|-----------------------------------------------------------------------------------------------------------------------------------------------------------------------------------------------------------------------------------------------------------------------------------------------------|--|
| 93 | <b>Observe:</b> Maintenance: What privacy does the latrine have?                | 1. <input type="radio"/> User visible from outside (no walls, or walls do not provide privacy to user).<br>2. <input type="radio"/> Cosmetic issues in need of repair, even though user is not visible from the outside.<br>3. <input type="radio"/> Walls in sufficient repair to provide privacy. |  |
| 94 | <b>Observe:</b> Maintenance: How clean is the hole/opening area of the latrine? | 1. <input type="radio"/> Dry and clean<br>2. <input type="radio"/> Dry but smeared with shit<br>3. <input type="radio"/> Wet but no smeared shit<br>4. <input type="radio"/> Wet and smeared with shit                                                                                              |  |

### Section 8: Washing Station Observations

|     |                                                                                                                                     |                                                                                                                                                                           |  |
|-----|-------------------------------------------------------------------------------------------------------------------------------------|---------------------------------------------------------------------------------------------------------------------------------------------------------------------------|--|
| 95  | <b>Observe:</b> Is there a hand washing station inside the latrine or within 10 paces of the latrine?                               | 1. <input type="radio"/> Yes → go to question 96<br>2. <input type="radio"/> No → go to question 100                                                                      |  |
| 96  | <b>Observe:</b> Is there water at this hand washing station?                                                                        | 1. <input type="radio"/> Yes → go to question 97<br>2. <input type="radio"/> No → go to question 98                                                                       |  |
| 97a | <b>Observe:</b> What device is used for water at this handwashing station?                                                          | 1. <input type="radio"/> Tap<br>2. <input type="radio"/> Tippy tap<br>3. <input type="radio"/> Bucket<br>4. <input type="radio"/> Wash basin                              |  |
| 97b |                                                                                                                                     | 5. <input type="radio"/> Other (specify):                                                                                                                                 |  |
| 98a | <b>Observe:</b> Is there a handwashing material at this hand washing station inside/near the latrine?<br><br>• Circle all responses | 1. <input type="radio"/> None<br>2. <input type="radio"/> Soap<br>3. <input type="radio"/> Detergent<br>4. <input type="radio"/> Ash<br>5. <input type="radio"/> Mud/sand |  |
| 98b |                                                                                                                                     | 6. <input type="radio"/> Other (specify):                                                                                                                                 |  |
| 99  | <b>Observe:</b> Does the washing station look like it has been recently used?                                                       | 1. <input type="radio"/> Yes<br>2. <input type="radio"/> No                                                                                                               |  |

## Section 9: Interactions

|      |                                                                                                                                                                                                                                                                                                                                                                                                                |                                                                                                                                                               |  |
|------|----------------------------------------------------------------------------------------------------------------------------------------------------------------------------------------------------------------------------------------------------------------------------------------------------------------------------------------------------------------------------------------------------------------|---------------------------------------------------------------------------------------------------------------------------------------------------------------|--|
| 100  | <p><b>Were you at the meeting when triggering/igniting happened in your community?</b></p> <ul style="list-style-type: none"> <li>• If the subject doesn't understand the question, ask "did you participate in the community triggering/igniting for sanitation and hygiene?"</li> <li>• If the subject still doesn't understand the question, mark "2 No".</li> </ul>                                        | <ol style="list-style-type: none"> <li>1. <input type="radio"/> Yes → go to question 101</li> <li>2. <input type="radio"/> No → go to question 102</li> </ol> |  |
| 101a | <p><b>Can you tell me what activities happened that day at the triggering/igniting?</b></p> <ul style="list-style-type: none"> <li>• Do <b>not</b> read the answers.</li> <li>• Circle all responses.</li> <li>• After they have finished responding, ask "were there any more activities?"</li> <li>• If the respondent indicates that (s)he does not know, do not probe for additional responses.</li> </ul> | <input type="checkbox"/> Visiting open defecation sites (transect walk)                                                                                       |  |
| 101b |                                                                                                                                                                                                                                                                                                                                                                                                                | <input type="checkbox"/> Visiting refuse dumps                                                                                                                |  |
| 101c |                                                                                                                                                                                                                                                                                                                                                                                                                | <input type="checkbox"/> Community mapping (mapping houses, latrines, refuse sites, open defecation sites)                                                    |  |
| 101d |                                                                                                                                                                                                                                                                                                                                                                                                                | <input type="checkbox"/> Shit calculation (calculating the amount of shit produced by the community)                                                          |  |
| 101e |                                                                                                                                                                                                                                                                                                                                                                                                                | <input type="checkbox"/> Fecal-oral contamination discussion (shit flow)                                                                                      |  |
| 101f |                                                                                                                                                                                                                                                                                                                                                                                                                | <input type="checkbox"/> Glass of water demonstration (putting a stick or hair into feces then water)                                                         |  |
| 101g |                                                                                                                                                                                                                                                                                                                                                                                                                | <input type="checkbox"/> Food demonstration (putting food near feces with flies)                                                                              |  |
| 101h |                                                                                                                                                                                                                                                                                                                                                                                                                | <input type="checkbox"/> Medical cost calculation (calculating the cost of illness, diarrhea, treatment)                                                      |  |
| 101i |                                                                                                                                                                                                                                                                                                                                                                                                                | <input type="checkbox"/> Community action planning                                                                                                            |  |
| 101j |                                                                                                                                                                                                                                                                                                                                                                                                                | <input type="checkbox"/> Does not remember                                                                                                                    |  |
| 101k |                                                                                                                                                                                                                                                                                                                                                                                                                | <input type="checkbox"/> Other (specify):                                                                                                                     |  |

|     |                                                                                                                                  |                                                             |  |
|-----|----------------------------------------------------------------------------------------------------------------------------------|-------------------------------------------------------------|--|
| 102 | <b>Have you discussed sanitation or handwashing issues with any of your neighbors in the past 2 months?</b>                      | 1. <input type="radio"/> Yes<br>2. <input type="radio"/> No |  |
| 103 | <b>Does your village or kebele provide labor for households that cannot afford to build their own latrines?</b>                  | 1. <input type="radio"/> Yes<br>2. <input type="radio"/> No |  |
| 104 | <b>Does your village or kebele provide construction materials for households that cannot afford to build their own latrines?</b> | 1. <input type="radio"/> Yes<br>2. <input type="radio"/> No |  |
| 105 | <b>In the last 2 months, have you visited your kebele's health post?</b>                                                         | 1. <input type="radio"/> Yes<br>2. <input type="radio"/> No |  |
| 106 | <b>In the past 2 months, has a Health Extension Worker visited your house?</b>                                                   | 1. <input type="radio"/> Yes<br>2. <input type="radio"/> No |  |
| 107 | <b>In the past 2 months, has a teacher visited your house to talk about sanitation or hygiene?</b>                               | 1. <input type="radio"/> Yes<br>2. <input type="radio"/> No |  |
